# Supplementary material for: Evaluation of the Effectiveness of Telehealth Chronic Disease Management System: Systematic Review and Meta-analysis
Source: J Med Internet Res. 2023 Apr 27;25:e44256. doi: 10.2196/44256 (PMC10176143; doi:10.2196/44256)
Supplement: Multimedia Appendix 1 [file jmir_v25i1e44256_app1.docx]

| Study | Country | Included in meta analysis? | Participants | | | | | Follow-up | Intervention | | Outcomes |
| --- | --- | --- | --- | --- | --- | --- | --- | --- | --- | --- | --- |
| Recruitment | Sample  , I:C | Total | Sex,  M:F | Age,  yr  (SD) | Int. | Con. |
| Galiano-Castillo ,  2016[15] | Spain | Yes | Breast cancer survivor from Oncology and Breast units at the Virgen de las Nieves Hospital (Granada, Spain). | 40:41 | 81 | - | 48.3  (8.8) | 8 weeks & 6 months | e-CUIDATE system that facilitates remote rehabilitation by offering exercise program and enabling self-monitoring. Patient’s records are processed remotely and research staff would call patients regularly | Receive basic recommendations (written format) for exercise | QoL (EORTC QLQ-C30)  Pain (BPI)  Fatigue (R-PFS)  Adherence rate (attendance rate) |
| Kardas, 2016[16] | Poland | Yes | 18-65 years old patient diagnosed with type 2 diabetes at least 6 months before study | 30:30 | 60 | 36:24 | 59.5  (6.9) | 6 weeks | COMMODITY12 system composed of a smart phone and wirelessly connected sensors that enables medical data analysis | Usual care | HRQOL(EuroQol-5D-5L)  Adherence  (Dose taken) |
| Salisbury, 2016[17] | U.K. | Yes | Patients with depression, aged 18 years or older | 307:302 | 609 | 192:417 | 49.5  (12.8) | 4 months & 8 months & 12 months | Patients received usual care plus intervention, which included a Healthlines web portal, linked to medical resources, depression monitoring modules and forum. | Usual care | Anxiety (GAD-7)  Depression  (PHQ-9)  QOL(EQ-5D-5L)  Self-efficacy(HeiQ) |
| Baron, 2017  [18,19] | U.K. | Yes | 18 years old and above patients with poorly controlled type1 or type 2 diabetes | 45:36 | 81 | 46:35 | 57.1  (13.6) | 3 months & 9 months | MTH equipment, mobile-phone software and relevant training that facilitate self-monitoring and telemonitoring | Follow-up appointment with diabetes specialist nurse every 3 to 4 months | Depression  (CESD-10)  Anxiety (STAI-6)  HRQOL(SF-12)  Self-efficacy (HeiQ)  Self-care  (SDSCA) |
| Uhm, 2017  [20] | Korea | Yes | Patients that were histologically confirmed breast cancer, age between 20 and 70 years | 179:177 | 356 | - | 50.3  (9.5) | 6 weeks & 12 weeks | mHealth with pedometer provided with a smartphone exercise application to encourage patients to exercise | Receive an exercise brochure | HRQOL(EORTC-QLQ-C30)  physical activity (IPAQ-SF) |
| Tupper, 2018[21] | Denmark | Yes | Patients with severe and very severe, stable COPD at high risk of exacerbations and hospital admissions | 141:140 | 281 | 137:144 | 69.6  (9.6) | 6 months | Patients reported clinical condition through tablet computer. The system offered remote measurement every 4 weeks and consultations without video | Scheduled visits at the outpatient clinics once or twice a year | HRQOL(15D QOL questionnaire) |
| Ren, 2019[22] | China | No | Patient with hypertension (blood pressure over 130/85 mmHg or taking antihypertensives) or diabetes (FBG over 5.55 mmol/L or taking anti-diabetes drug), age over 40 years old | 139:142 | 281 | 116:165 | 59.4  (10.0) | 6 months | Install a mobile health app and receive a smart band to monitoring everyday physical and clinical condition. Specialists gave advice based on recorded data. | Communities offered regular diabetes management services. Specialist offers regular medical suggestions and prescription | Medical Adherence (self-reported adherence)  Physical Activity (GPAQ) |
| Zhao, 2019[23] | China | No | Patients diagnosed with type 2 diabetes, age between 40 and 80 | 37:38 | 75 | 49:26 | 58.3  (8.5) | 3 months | Participating in diabetes-related lectures and using a mobile health App that has three main functions 1) notification and message; 2) index measurement 3) data analysis | Participating in diabetes-related lectures only | Self-efficacy  (KBA)  Self-management  (KBA)  Social support  (PROMIS) |
| Wagenaar, 2019[24] | Netherlands | No | Patients with heart failure, age over 18 | 150/150 | 300 | 222:78 | 66.8  (11.1) | 3 months & 6 months & 9 months | Patient used e-Vita platform to record clinical data, automatically analyse the data and nurses contact patient if there is any abnormal condition. | Receive usual care from heart failure outpatient team, which consisted of on average 4 routine consultations a year | HRQOL (Minnesota living with HF questionnaire) Self-care (EHRScB) |
| Schoenthaler, 2020[25] | U.S. | No | Patients who self-identified as African American, received care at the primary care clinic, had uncontrolled hypertension, at least 18 years old | 21:21 | 42 | 23:19 | 57.6  (5.6) | 3 months | Receive mHealth intervention consisted of 3 main parts: 1) a tailoring survey of adherence questionnaire 2) an individualized adherence-promoting adherence profile 3) a personalized list of interactive adherence-promoting modules | Complete the introductory tailoring survey on the same platform; but did not receive the results display their adherence barriers | Adherence  (MMAS-8)  Health literacy  (s-TOFHLA) |
| Broers, 2019[26] | Spain & Netherlands | No | Patient primarily diagnosed with cardiovascular disease, age between 18 to 75 years | 76:74 | 150 | 107:43 | 62.0  (11.6) | 3 months & 6 months | Receive technological devices, including Fitbit smart watch, Beddit sleep tracker, etc., to obtain objective measures on patients’ physical functioning | Did not receive wearable and monitoring devices, only receive the treatment as usual | Depression  (PHQ-9)  Anxiety (GAD-7) QOL(WHOQOL)  Life-style (HPLP)  Satisfaction  (CSQ-8)  Type D Personality  (Type D scale) |
| Cichosz, 2018[27] | Denmark | Yes | Patients with heart failure and were placed within the New York Heart Association class 2, 3, or 4. | 93:100 | 193 | 141:52 | 70.5  (-)a | 12 months | Patient was engaged in their own illness through self-monitoring. Specially trained nurses assessed all the data in system and patients were contacted if data were not received as planned. | Receive usual care only that consisted of usual treatment, monitoring and care | HRQOL(SF36) |
| Clark, 2020[28] | U.S. | No | Patients diagnosed with type 2 diabetes and poor glycemic control Age between 18 and 75 years | 63:63 | 126 | 32:94 | 48.4  (9.8) | 3 months & 6 months | Usual care and receive motivational, educational or call to action text message over a 6-month period every 2 to 3 per day, and was encouraged to text message back. | Usual care including visits with a primary care physician, certified diabetes educator and group DSME/S | Distress (DDS) |
| Caceres, 2020[29] | U.S. | Yes | Patients over the age of 18 with documented atrial fibrillation (AF) and under AF treatment | 115:123 | 238 | 183:55 | 61.3  (11.8) | 6 months | iHEART intervention, which consisted of an iPhone equipped with a mobile ECG system to records clinical conditions. Patients will receive provider caring once abnormal clinical situation was captured | Receive usual care | HRQoL (AFEQT, SF36, EQ-5D)  QALYs (EQ-5D index) |
| Van der Hout, 2020[30] | Netherlands | No | Patients were cancer survivors, age over 18 years and 3 months to 5 years after treatment | 320:305 | 625 | 316:309 | 65  (-)a | 3 months & 6 months | Use Oncokompas which supports self-management in cancer survivors, by monitoring symptoms and health related quality of life | Receive usual care and will have access to Oncokompas after 6 months | QALYs (EQ-5D) |
| Clays, 2021[31] | Belgium & Italy | No | Adult ambulatory congestive heart failure patient in a stable condition | 34/22 | 56 | 43:13 | 63.1  (10.5) | - | Patients in the intervention group continued to receive usual care, and additionally used the HeartMan personal health system in their home setting | Receive usual care | Depression (BDI)  Anxiety (STAI-Y)  HRQOL(MLHFQ) Self-care (SCHFI) |
| Guo, 2021[32] | China | Yes | Patients diagnosed with type 2 diabetes, age between 18 and 75 years | 32:32 | 64 | 39:25 | 57.3  (14.4) | 4 weeks | Receive mHealth management based on the mHealth management model that consisted of a network platform, a implantable glucose sensor, a mobile app and GP support | Receive usual health management. GP conducted telephone follow-ups once a week. Health education material is delivered at follow-up visit | HRQOL (diabetes specific QOL) Self-care(SDSCA) |
| Zhang, 2021[33] | China | No | Patient suffering from pain that met cancer pain diagnostic criteria, age over 18 years | 51:49 | 100 | 72:28 | 56.6  (14.5) | 4 weeks | Patient received daily 24-hour pain diaries, ADR forms every 3 days and BPI form every 15 days | Receive conventional care and detailed medication education | Adherence (MMAS)  Pain (BPI) |
| Vos, 2021[34] | Netherlands | No | Patients receiving primary surgical treatment for stage I-III colon cancer or rectosigmoid carcinoma and qualified for routine follow-up | 68:73  83:79 | 141  162 | 98:43  105:57 | 68.0a  68.5a | 3 months & 6 months & 12 months | Divided into 2 subgroup controlled trial:   1. General-practitioner-led care group 2. Surgeon-led care group   Patient uses Oncokompas that enables self-management | 1)General-practitioner-led care without Oncokompas access 2)Surgeon-led care group without Oncokompas access | HRQOL (EORTC QLQ-C30) |
| Saleh, 2022[35] | Jordan | Yes | Patients with heart failure | 65:67 | 132 | 80:52 | 60.8  (10.5) | 8 weeks | Use a mobile health app tailored to decrease the time spent in sedentary behaviours and to increase the time spent in physical activities performed at light and creator intensity levels | Medical management by information guidance offered by a cardiologist for patients with Heart Disease | HRQOL (SF-36),  Symptom burden (MSAS-HF) |

a These studies do not provide mean and standard deviation for age. Instead, they provide median, 25th and 75th percentile. We use the median to approximate the mean age and omit standard deviation.
